# Supplementary material
Source: PubMed Central journal article supplement (PMC7527937)
Supplement: jamacardiol-e204397-s002.pdf [file jamacardiol-e204397-s002.pdf]

## Supplementary Online Content

Arnold SV, Chinnakondepalli KM, Magnuson EA, et al; CoreValve US Pivotal Trial Investigators. Five-year health status after self-expanding transcatheter or surgical aortic valve replacement in high-risk patients with severe aortic stenosis *JAMA Cardiol*. Published online September 30, 2020. doi:10.1001/jamacardio.2020.4397

**eTable 1.** Baseline characteristics stratified by access site

**eTable 2.** Unadjusted mean ( $\pm$  SD) health status scores over time and within group comparisons to baseline

**eTable 3.** Between group differences in health status, stratified by access site

**eTable 4.** Predicted mean values and between group comparisons of KCCQ-OS, according to pattern mixture models (Iliofemoral cohort)

This supplementary material has been provided by the authors to give readers additional information about their work.

| <b>eTable 1. Baseline characteristics stratified by access site</b> |                         |                         |                |                        |                        |                |
|---------------------------------------------------------------------|-------------------------|-------------------------|----------------|------------------------|------------------------|----------------|
|                                                                     | <b>Iliofemoral</b>      |                         |                | <b>Non-Iliofemoral</b> |                        |                |
|                                                                     | <b>TAVR<br/>(N=316)</b> | <b>SAVR<br/>(N=283)</b> | <b>P-Value</b> | <b>TAVR<br/>(N=61)</b> | <b>SAVR<br/>(N=53)</b> | <b>P-Value</b> |
| Age, years                                                          | 83.5 ± 6.9              | 83.5 ± 6.3              | 0.901          | 81.9 ± 8.1             | 83.4 ± 6.5             | 0.282          |
| Male sex                                                            | 168 (53.2%)             | 151 (53.4%)             | 0.962          | 31 (50.8%)             | 27 (50.9%)             | 0.989          |
| STS Risk Score, %                                                   | 7.3 ± 3.1               | 7.6 ± 3.2               | 0.331          | 7.2 ± 2.6              | 7.7 ± 4.1              | 0.465          |
| Prior Myocardial Infarction                                         | 70 (22.2%)              | 67 (23.7%)              | 0.657          | 23 (37.7%)             | 15 (28.3%)             | 0.288          |
| Prior Coronary Artery Bypass Surgery                                | 97 (30.7%)              | 88 (31.1%)              | 0.915          | 13 (21.3%)             | 18 (34.0%)             | 0.130          |
| Prior Percutaneous Coronary Intervention                            | 105 (33.2%)             | 108 (38.2%)             | 0.207          | 27 (44.3%)             | 20 (37.7%)             | 0.480          |
| Prior Pacemaker                                                     | 76 (24.1%)              | 63 (22.3%)              | 0.604          | 10 (16.4%)             | 9 (17.0%)              | 0.933          |
| Prior Stroke                                                        | 54 (17.1%)              | 54 (19.1%)              | 0.526          | 9 (14.8%)              | 17 (32.7%)             | 0.023          |
| Peripheral Vascular Disease                                         | 115 (36.7%)             | 104 (37.0%)             | 0.945          | 38 (62.3%)             | 36 (67.9%)             | 0.529          |
| Chronic Lung Disease                                                | 142 (44.9%)             | 132 (46.6%)             | 0.675          | 27 (44.3%)             | 18 (34.0%)             | 0.261          |
| Home Oxygen                                                         | 43 (13.7%)              | 33 (11.7%)              | 0.465          | 5 (8.2%)               | 3 (5.7%)               | 0.722          |
| Diabetes Mellitus                                                   | 104 (32.9%)             | 125 (44.2%)             | 0.004          | 24 (39.3%)             | 21 (39.6%)             | 0.975          |
| Atrial Fibrillation                                                 | 130 (41.1%)             | 139 (49.1%)             | 0.050          | 25 (41.7%)             | 21 (39.6%)             | 0.825          |
| Chronic Kidney Disease                                              |                         |                         |                |                        |                        |                |
| Stage III                                                           | 189 (59.8%)             | 170 (60.1%)             | 0.948          | 35 (57.4%)             | 32 (60.4%)             | 0.745          |
| Stage IV/V                                                          | 33 (10.4%)              | 30 (10.6%)              | 0.949          | 9 (14.8%)              | 7 (13.2%)              | 0.812          |
| Ejection Fraction, %                                                | 58.0 ± 11.1             | 57.3 ± 11.7             | 0.484          | 57.1 ± 13.6            | 58.6 ± 12.6            | 0.562          |
| Mean Aortic Gradient, mmHg                                          | 48.5 ± 15.3             | 47.9 ± 14.4             | 0.621          | 46.7 ± 16.5            | 46.5 ± 11.8            | 0.943          |
| KCCQ Overall Summary Score                                          | 45.9 ± 23.5             | 45.9 ± 22.4             | 0.983          | 51.5 ± 22.1            | 51.2 ± 21.0            | 0.937          |
| KCCQ Physical Limitations                                           | 45.6 ± 25.2             | 45.7 ± 25.0             | 0.992          | 50.9 ± 22.9            | 47.9 ± 24.9            | 0.500          |
| KCCQ Total Symptoms                                                 | 55.4 ± 24.9             | 54.4 ± 24.6             | 0.599          | 59.9 ± 22.4            | 61.2 ± 23.6            | 0.768          |
| KCCQ Quality of Life                                                | 40.6 ± 24.8             | 41.8 ± 23.6             | 0.535          | 45.9 ± 24.7            | 45.1 ± 23.8            | 0.864          |
| KCCQ Social Limitations                                             | 40.6 ± 30.3             | 40.3 ± 29.6             | 0.906          | 48.5 ± 30.9            | 49.4 ± 28.0            | 0.872          |
| SF-12 Physical Summary Score                                        | 30.6 ± 9.0              | 30.6 ± 8.4              | 0.927          | 31.4 ± 10.1            | 32.8 ± 9.0             | 0.437          |
| SF-12 Mental Summary Score                                          | 47.0 ± 12.3             | 48.7 ± 11.6             | 0.098          | 49.5 ± 10.5            | 46.8 ± 11.7            | 0.197          |

| <b>eTable 2. Unadjusted mean (<math>\pm</math> SD) health status scores over time and within group comparisons to baseline</b> |                         |                |                         |                |                        |                |                        |                |
|--------------------------------------------------------------------------------------------------------------------------------|-------------------------|----------------|-------------------------|----------------|------------------------|----------------|------------------------|----------------|
|                                                                                                                                | <b>Iliofemoral</b>      |                |                         |                | <b>Non-Iliofemoral</b> |                |                        |                |
| <b>Scale/Time Point</b>                                                                                                        | <b>TAVR<br/>(n=331)</b> | <b>p-value</b> | <b>SAVR<br/>(n=334)</b> | <b>p-value</b> | <b>TAVR<br/>(n=64)</b> | <b>p-value</b> | <b>SAVR<br/>(n=68)</b> | <b>p-value</b> |
| <b>KCCQ Overall Summary</b>                                                                                                    |                         |                |                         |                |                        |                |                        |                |
| Baseline                                                                                                                       | 45.9 $\pm$ 23.5         |                | 45.9 $\pm$ 22.4         |                | 51.5 $\pm$ 22.1        |                | 51.2 $\pm$ 21.0        |                |
| 1 month                                                                                                                        | 67.7 $\pm$ 23.4         | <0.001         | 51.1 $\pm$ 24.7         | 0.073          | 57.1 $\pm$ 26.2        | 0.529          | 55.5 $\pm$ 29.2        | 0.348          |
| 6 months                                                                                                                       | 72.3 $\pm$ 21.9         | <0.001         | 71.0 $\pm$ 21.1         | <0.001         | 72.1 $\pm$ 24.9        | <0.001         | 68.8 $\pm$ 25.8        | 0.001          |
| 1 year                                                                                                                         | 72.4 $\pm$ 21.4         | <0.001         | 69.6 $\pm$ 22.2         | <0.001         | 69.5 $\pm$ 24.2        | <0.001         | 77.0 $\pm$ 20.4        | <0.001         |
| 2 years                                                                                                                        | 72.3 $\pm$ 21.9         | <0.001         | 66.5 $\pm$ 23.1         | <0.001         | 68.4 $\pm$ 24.7        | 0.006          | 68.8 $\pm$ 25.2        | 0.004          |
| 3 years                                                                                                                        | 66.6 $\pm$ 23.9         | <0.001         | 70.0 $\pm$ 21.7         | <0.001         | 70.4 $\pm$ 22.3        | 0.058          | 69.8 $\pm$ 23.7        | 0.013          |
| 4 years                                                                                                                        | 68.2 $\pm$ 24.3         | <0.001         | 67.7 $\pm$ 21.7         | <0.001         | 68.6 $\pm$ 23.7        | 0.014          | 69.4 $\pm$ 19.4        | 0.032          |
| 5 years                                                                                                                        | 65.7 $\pm$ 20.5         | <0.001         | 65.3 $\pm$ 21.3         | <0.001         | 71.1 $\pm$ 25.0        | 0.047          | 70.1 $\pm$ 14.0        | 0.031          |
| <b>KCCQ Physical Limitations</b>                                                                                               |                         |                |                         |                |                        |                |                        |                |
| Baseline                                                                                                                       | 45.6 $\pm$ 25.2         |                | 45.7 $\pm$ 25.0         |                | 50.9 $\pm$ 22.9        |                | 47.9 $\pm$ 24.9        |                |
| 1 month                                                                                                                        | 61.6 $\pm$ 27.7         | <0.001         | 45.5 $\pm$ 27.8         | 0.414          | 52.1 $\pm$ 31.2        | 0.476          | 49.5 $\pm$ 31.6        | 0.620          |
| 6 months                                                                                                                       | 62.5 $\pm$ 26.0         | <0.001         | 62.3 $\pm$ 25.6         | <0.001         | 61.7 $\pm$ 33.4        | 0.047          | 60.8 $\pm$ 27.6        | 0.009          |
| 1 year                                                                                                                         | 62.9 $\pm$ 26.8         | <0.001         | 60.0 $\pm$ 25.9         | <0.001         | 59.7 $\pm$ 29.3        | 0.051          | 64.0 $\pm$ 27.2        | 0.001          |
| 2 years                                                                                                                        | 59.9 $\pm$ 26.5         | <0.001         | 56.7 $\pm$ 26.1         | 0.005          | 55.5 $\pm$ 30.3        | 0.758          | 58.1 $\pm$ 29.8        | 0.091          |
| 3 years                                                                                                                        | 54.5 $\pm$ 28.1         | 0.065          | 59.1 $\pm$ 26.0         | 0.002          | 57.7 $\pm$ 26.3        | 0.738          | 60.3 $\pm$ 27.9        | 0.191          |
| 4 years                                                                                                                        | 54.5 $\pm$ 25.6         | 0.118          | 57.2 $\pm$ 24.9         | 0.065          | 56.5 $\pm$ 29.9        | 0.382          | 57.0 $\pm$ 26.9        | 0.625          |
| 5 years                                                                                                                        | 54.8 $\pm$ 24.8         | 0.428          | 53.5 $\pm$ 23.5         | 0.391          | 62.1 $\pm$ 31.0        | 0.251          | 61.1 $\pm$ 21.7        | 0.200          |
| <b>KCCQ Total Symptoms</b>                                                                                                     |                         |                |                         |                |                        |                |                        |                |
| Baseline                                                                                                                       | 55.4 $\pm$ 24.9         |                | 54.4 $\pm$ 24.6         |                | 59.9 $\pm$ 22.4        |                | 61.2 $\pm$ 23.6        |                |
| 1 month                                                                                                                        | 72.5 $\pm$ 21.4         | <0.001         | 62.0 $\pm$ 24.2         | 0.016          | 65.4 $\pm$ 23.7        | 0.500          | 65.9 $\pm$ 25.1        | 0.490          |
| 6 months                                                                                                                       | 77.2 $\pm$ 20.8         | <0.001         | 77.1 $\pm$ 19.6         | <0.001         | 77.6 $\pm$ 20.5        | <0.001         | 76.0 $\pm$ 25.8        | 0.033          |
| 1 year                                                                                                                         | 75.7 $\pm$ 21.0         | <0.001         | 74.6 $\pm$ 22.0         | <0.001         | 73.8 $\pm$ 22.4        | 0.002          | 82.4 $\pm$ 19.4        | <0.001         |
| 2 years                                                                                                                        | 76.9 $\pm$ 21.3         | <0.001         | 71.7 $\pm$ 23.5         | <0.001         | 73.7 $\pm$ 22.5        | 0.034          | 74.5 $\pm$ 22.0        | 0.036          |
| 3 years                                                                                                                        | 71.6 $\pm$ 22.3         | <0.001         | 75.5 $\pm$ 21.2         | <0.001         | 73.9 $\pm$ 20.3        | 0.209          | 77.3 $\pm$ 20.8        | 0.030          |
| 4 years                                                                                                                        | 73.5 $\pm$ 23.2         | <0.001         | 73.6 $\pm$ 21.3         | <0.001         | 76.8 $\pm$ 23.7        | 0.043          | 79.2 $\pm$ 14.9        | 0.061          |
| 5 years                                                                                                                        | 70.1 $\pm$ 21.6         | 0.017          | 69.3 $\pm$ 21.4         | 0.000          | 75.0 $\pm$ 23.6        | 0.137          | 77.8 $\pm$ 12.0        | 0.105          |
| <b>KCCQ Quality of Life</b>                                                                                                    |                         |                |                         |                |                        |                |                        |                |
| Baseline                                                                                                                       | 40.6 $\pm$ 24.8         |                | 41.8 $\pm$ 23.6         |                | 45.9 $\pm$ 24.7        |                | 45.1 $\pm$ 23.8        |                |
| 1 month                                                                                                                        | 71.0 $\pm$ 26.1         | <0.001         | 52.1 $\pm$ 27.6         | <0.001         | 59.6 $\pm$ 30.8        | 0.052          | 53.4 $\pm$ 31.3        | 0.088          |
| 6 months                                                                                                                       | 77.2 $\pm$ 24.3         | <0.001         | 73.8 $\pm$ 25.7         | <0.001         | 75.8 $\pm$ 23.7        | <0.001         | 67.4 $\pm$ 27.0        | <0.001         |
| 1 year                                                                                                                         | 77.1 $\pm$ 23.4         | <0.001         | 75.9 $\pm$ 23.6         | <0.001         | 71.2 $\pm$ 26.1        | <0.001         | 79.8 $\pm$ 21.0        | <0.001         |
| 2 years                                                                                                                        | 78.9 $\pm$ 22.7         | <0.001         | 72.7 $\pm$ 24.5         | <0.001         | 72.9 $\pm$ 25.8        | <0.001         | 70.0 $\pm$ 26.2        | <0.001         |
| 3 years                                                                                                                        | 74.9 $\pm$ 25.4         | <0.001         | 76.7 $\pm$ 22.5         | <0.001         | 76.0 $\pm$ 22.9        | 0.001          | 70.6 $\pm$ 26.8        | 0.001          |
| 4 years                                                                                                                        | 75.2 $\pm$ 26.1         | <0.001         | 74.9 $\pm$ 22.9         | <0.001         | 72.1 $\pm$ 23.1        | <0.001         | 72.6 $\pm$ 22.1        | 0.001          |
| 5 years                                                                                                                        | 74.5 $\pm$ 21.8         | <0.001         | 70.8 $\pm$ 24.3         | <0.001         | 78.3 $\pm$ 22.9        | 0.001          | 71.2 $\pm$ 17.9        | 0.016          |

| Scale/Time Point              | Iliofemoral     |         |                 |         | Non-Iliofemoral |         |                |         |
|-------------------------------|-----------------|---------|-----------------|---------|-----------------|---------|----------------|---------|
|                               | TAVR<br>(n=331) | p-value | SAVR<br>(n=334) | p-value | TAVR<br>(n=64)  | p-value | SAVR<br>(n=68) | p-value |
| <b>KCCQ Social Limitation</b> |                 |         |                 |         |                 |         |                |         |
| Baseline                      | 40.6 ± 30.3     |         | 40.3 ± 29.6     |         | 48.5 ± 30.9     |         | 49.4 ± 28.0    |         |
| 1 month                       | 61.6 ± 30.3     | <0.001  | 43.3 ± 31.7     | 0.895   | 46.1 ± 32.0     | 0.550   | 43.0 ± 35.7    | 0.932   |
| 6 months                      | 68.6 ± 29.7     | <0.001  | 67.9 ± 26.5     | <0.001  | 71.3 ± 31.2     | 0.003   | 65.7 ± 34.1    | 0.148   |
| 1 year                        | 71.0 ± 28.6     | <0.001  | 66.5 ± 29.2     | <0.001  | 70.2 ± 28.2     | <0.001  | 78.6 ± 25.2    | 0.003   |
| 2 years                       | 70.2 ± 29.6     | <0.001  | 62.4 ± 29.9     | <0.001  | 69.1 ± 29.5     | 0.008   | 67.6 ± 31.5    | 0.092   |
| 3 years                       | 61.1 ± 30.9     | <0.001  | 64.6 ± 29.7     | <0.001  | 74.1 ± 32.6     | 0.220   | 68.3 ± 28.6    | 0.075   |
| 4 years                       | 58.6 ± 33.1     | <0.001  | 61.3 ± 30.2     | <0.001  | 65.6 ± 29.5     | 0.093   | 66.4 ± 27.6    | 0.422   |
| 5 years                       | 61.2 ± 29.9     | 0.014   | 62.9 ± 27.4     | <0.001  | 64.4 ± 30.8     | 0.189   | 72.2 ± 18.4    | 0.135   |
| <b>SF-12 Physical Summary</b> |                 |         |                 |         |                 |         |                |         |
| Baseline                      | 30.6 ± 9.0      |         | 30.6 ± 8.4      |         | 31.4 ± 10.1     |         | 32.8 ± 9.0     |         |
| 1 month                       | 36.3 ± 9.6      | <0.001  | 31.7 ± 8.6      | 0.889   | 33.3 ± 9.7      | 0.412   | 33.2 ± 9.1     | 0.667   |
| 6 months                      | 37.2 ± 10.3     | <0.001  | 37.6 ± 9.7      | <0.001  | 38.4 ± 10.4     | 0.002   | 37.9 ± 11.9    | 0.082   |
| 1 year                        | 36.7 ± 11.4     | <0.001  | 36.4 ± 9.7      | <0.001  | 38.9 ± 9.7      | 0.003   | 39.6 ± 9.3     | 0.004   |
| 2 years                       | 36.1 ± 10.7     | <0.001  | 34.9 ± 10.1     | <0.001  | 36.4 ± 11.8     | 0.120   | 39.4 ± 8.8     | 0.027   |
| 3 years                       | 34.4 ± 10.8     | 0.001   | 35.9 ± 9.7      | <0.001  | 35.2 ± 12.4     | 0.549   | 36.8 ± 10.6    | 0.557   |
| 4 years                       | 34.6 ± 10.8     | 0.001   | 35.0 ± 9.4      | 0.001   | 33.4 ± 10.6     | 0.582   | 35.8 ± 9.0     | 0.783   |
| 5 years                       | 32.5 ± 10.8     | 0.498   | 33.2 ± 8.8      | 0.181   | 34.0 ± 11.0     | 0.921   | 33.1 ± 8.2     | 0.332   |
| <b>SF-12 Mental Summary</b>   |                 |         |                 |         |                 |         |                |         |
| Baseline                      | 47.0 ± 12.3     |         | 48.7 ± 11.6     |         | 49.5 ± 10.5     |         | 46.8 ± 11.7    |         |
| 1 month                       | 51.4 ± 10.9     | <0.001  | 44.7 ± 12.7     | 0.010   | 48.8 ± 12.6     | 0.278   | 47.3 ± 15.3    | 0.900   |
| 6 months                      | 52.6 ± 10.7     | <0.001  | 51.4 ± 11.0     | 0.011   | 51.8 ± 11.7     | 0.319   | 49.7 ± 10.4    | 0.318   |
| 1 year                        | 52.7 ± 10.6     | <0.001  | 52.5 ± 10.8     | 0.004   | 52.7 ± 12.2     | 0.098   | 53.0 ± 8.7     | 0.058   |
| 2 years                       | 51.8 ± 11.2     | <0.001  | 50.7 ± 11.3     | 0.137   | 52.2 ± 10.6     | 0.355   | 48.5 ± 10.0    | 0.619   |
| 3 years                       | 51.8 ± 11.8     | 0.003   | 52.7 ± 10.2     | 0.012   | 53.4 ± 10.6     | 0.493   | 50.6 ± 10.7    | 0.220   |
| 4 years                       | 51.7 ± 11.6     | 0.030   | 50.9 ± 10.0     | 0.241   | 54.1 ± 7.3      | 0.288   | 47.7 ± 11.0    | 0.758   |
| 5 years                       | 50.5 ± 10.7     | 0.755   | 50.2 ± 11.2     | 0.418   | 50.0 ± 11.8     | 0.941   | 52.3 ± 11.4    | 0.361   |

| <b>eTable 3. Between group differences in health status, stratified by access site</b> |                                                       |                |                                                       |                |
|----------------------------------------------------------------------------------------|-------------------------------------------------------|----------------|-------------------------------------------------------|----------------|
|                                                                                        | <b>Iliofemoral</b>                                    |                | <b>Non-Iliofemoral</b>                                |                |
|                                                                                        | <b>Mean Treatment Difference (TAVR-SAVR) (95% CI)</b> | <b>P-Value</b> | <b>Mean Treatment Difference (TAVR-SAVR) (95% CI)</b> | <b>P-Value</b> |
| <b>KCCQ Overall Summary</b>                                                            |                                                       |                |                                                       |                |
| 1 Month                                                                                | 16.8 (12.4 to 21.2)                                   | <0.001         | -0.8 (-11.6 to 9.9)                                   | 0.880          |
| 6 Months                                                                               | 1.8 (-2.4 to 6.1)                                     | 0.395          | 0.0 (-10.0 to 10.0)                                   | 0.999          |
| 1 Year                                                                                 | 2.4 (-2.0 to 6.8)                                     | 0.280          | -1.5 (-12.0 to 9.1)                                   | 0.786          |
| 2 Years                                                                                | 4.0 (-0.5 to 8.6)                                     | 0.084          | -1.0 (-12.3 to 10.3)                                  | 0.865          |
| 3 Years                                                                                | -2.5 (-7.5 to 2.5)                                    | 0.327          | 0.4 (-11.6 to 12.3)                                   | 0.951          |
| 4 Years                                                                                | 2.5 (-2.8 to 7.8)                                     | 0.357          | 2.8 (-9.5 to 15.1)                                    | 0.658          |
| 5 Years                                                                                | 1.7 (-4.2 to 7.7)                                     | 0.566          | 2.3 (-11.6 to 16.1)                                   | 0.748          |
| <b>KCCQ Physical Limitations</b>                                                       |                                                       |                |                                                       |                |
| 1 Month                                                                                | 17.1 (11.8 to 22.5)                                   | <0.001         | -1.7 (-14.8 to 11.5)                                  | 0.804          |
| 6 Months                                                                               | 1.2 (-3.9 to 6.3)                                     | 0.648          | -3.8 (-15.7 to 8.0)                                   | 0.525          |
| 1 Year                                                                                 | 1.6 (-3.6 to 6.8)                                     | 0.550          | -1.6 (-14.0 to 10.9)                                  | 0.803          |
| 2 Years                                                                                | 3.1 (-2.4 to 8.5)                                     | 0.269          | -6.4 (-20.0 to 7.2)                                   | 0.358          |
| 3 Years                                                                                | -3.9 (-9.8 to 2.1)                                    | 0.200          | -6.5 (-20.6 to 7.7)                                   | 0.370          |
| 4 Years                                                                                | 1.1 (-5.3 to 7.5)                                     | 0.737          | 0.3 (-14.4 to 15.1)                                   | 0.966          |
| 5 Years                                                                                | 4.3 (-2.8 to 11.3)                                    | 0.233          | -4.4 (-20.7 to 12.0)                                  | 0.602          |
| <b>KCCQ Total Symptoms</b>                                                             |                                                       |                |                                                       |                |
| 1 Month                                                                                | 10.1 (5.9 to 14.3)                                    | <0.001         | -1.9 (-12.2 to 8.4)                                   | 0.724          |
| 6 Months                                                                               | 0.4 (-3.6 to 4.5)                                     | 0.835          | 1.4 (-8.1 to 10.9)                                    | 0.766          |
| 1 Year                                                                                 | 1.0 (-3.2 to 5.2)                                     | 0.634          | -4.8 (-14.9 to 5.3)                                   | 0.350          |
| 2 Years                                                                                | 3.6 (-0.8 to 8.0)                                     | 0.111          | -1.9 (-12.8 to 9.0)                                   | 0.732          |
| 3 Years                                                                                | -3.3 (-8.2 to 1.5)                                    | 0.178          | -3.5 (-15.1 to 8.1)                                   | 0.559          |
| 4 Years                                                                                | 1.3 (-3.9 to 6.5)                                     | 0.617          | 2.4 (-9.6 to 14.4)                                    | 0.694          |
| 5 Years                                                                                | 1.2 (-4.7 to 7.0)                                     | 0.701          | -0.9 (-14.5 to 12.8)                                  | 0.898          |
| <b>KCCQ Quality of Life</b>                                                            |                                                       |                |                                                       |                |
| 1 Month                                                                                | 19.6 (14.7 to 24.5)                                   | <0.001         | 3.3 (-8.7 to 15.2)                                    | 0.590          |
| 6 Months                                                                               | 4.2 (-0.5 to 9.0)                                     | 0.081          | 3.1 (-8.1 to 14.3)                                    | 0.588          |
| 1 Year                                                                                 | 1.3 (-3.6 to 6.2)                                     | 0.600          | -3.9 (-15.8 to 7.9)                                   | 0.513          |
| 2 Years                                                                                | 4.9 (-0.2 to 10.1)                                    | 0.058          | 2.3 (-10.4 to 14.9)                                   | 0.726          |
| 3 Years                                                                                | -1.1 (-6.7 to 4.5)                                    | 0.698          | 2.4 (-11.1 to 15.8)                                   | 0.729          |
| 4 Years                                                                                | 1.5 (-4.4 to 7.5)                                     | 0.615          | 2.6 (-11.1 to 16.4)                                   | 0.709          |
| 5 Years                                                                                | 5.1 (-1.7 to 11.9)                                    | 0.141          | 8.1 (-7.7 to 23.8)                                    | 0.316          |

|                               | <b>Iliofemoral</b>                                        |                | <b>Non-Iliofemoral</b>                                    |                |
|-------------------------------|-----------------------------------------------------------|----------------|-----------------------------------------------------------|----------------|
|                               | <b>Mean Treatment Difference<br/>(TAVR-SAVR) (95% CI)</b> | <b>P-Value</b> | <b>Mean Treatment Difference<br/>(TAVR-SAVR) (95% CI)</b> | <b>P-Value</b> |
| <b>KCCQ Social Limitation</b> |                                                           |                |                                                           |                |
| 1 Month                       | 18.7 (12.4 to 25.1)                                       | <0.001         | -3.0 (-19.3 to 13.4)                                      | 0.722          |
| 6 Months                      | 1.4 (-4.7 to 7.4)                                         | 0.654          | 6.3 (-7.9 to 20.4)                                        | 0.384          |
| 1 Year                        | 1.4 (-4.8 to 7.6)                                         | 0.660          | 5.1 (-9.6 to 19.9)                                        | 0.493          |
| 2 Years                       | 2.0 (-4.6 to 8.6)                                         | 0.550          | 0.6 (-14.9 to 16.1)                                       | 0.941          |
| 3 Years                       | -4.3 (-11.4 to 2.8)                                       | 0.232          | 5.6 (-11.3 to 22.5)                                       | 0.515          |
| 4 Years                       | -1.7 (-9.3 to 6.0)                                        | 0.672          | 7.3 (-9.8 to 24.4)                                        | 0.403          |
| 5 Years                       | -2.1 (-10.9 to 6.7)                                       | 0.642          | -2.6 (-23.2 to 18.1)                                      | 0.807          |
| <b>SF-12 Physical Summary</b> |                                                           |                |                                                           |                |
| 1 Month                       | 4.9 (3.0 to 6.9)                                          | <0.001         | 2.5 (-2.4 to 7.4)                                         | 0.325          |
| 6 Months                      | -0.6 (-2.5 to 1.3)                                        | 0.539          | 1.5 (-2.8 to 5.8)                                         | 0.496          |
| 1 Year                        | 0.4 (-1.5 to 2.4)                                         | 0.653          | 0.7 (-3.9 to 5.4)                                         | 0.753          |
| 2 Years                       | 0.7 (-1.3 to 2.8)                                         | 0.483          | -2.4 (-7.4 to 2.6)                                        | 0.344          |
| 3 Years                       | -1.5 (-3.7 to 0.7)                                        | 0.192          | -0.3 (-5.5 to 5.0)                                        | 0.920          |
| 4 Years                       | 0.6 (-1.7 to 3.0)                                         | 0.603          | 0.6 (-4.9 to 6.1)                                         | 0.833          |
| 5 Years                       | -0.3 (-3.0 to 2.4)                                        | 0.801          | 0.9 (-5.6 to 7.3)                                         | 0.796          |
| <b>SF-12 Mental Summary</b>   |                                                           |                |                                                           |                |
| 1 Month                       | 6.6 (4.3 to 8.8)                                          | <0.001         | -1.7 (-7.2 to 3.9)                                        | 0.560          |
| 6 Months                      | 2.0 (-0.1 to 4.1)                                         | 0.063          | -0.2 (-5.1 to 4.7)                                        | 0.938          |
| 1 Year                        | 1.1 (-1.1 to 3.3)                                         | 0.332          | 0.9 (-4.3 to 6.2)                                         | 0.726          |
| 2 Years                       | 1.0 (-1.4 to 3.3)                                         | 0.423          | 2.3 (-3.4 to 8.0)                                         | 0.428          |
| 3 Years                       | -0.3 (-2.9 to 2.2)                                        | 0.807          | 1.8 (-4.2 to 7.8)                                         | 0.553          |
| 4 Years                       | 1.0 (-1.7 to 3.7)                                         | 0.471          | 7.1 (0.8 to 13.5)                                         | 0.027          |
| 5 Years                       | 0.0 (-3.1 to 3.1)                                         | 0.985          | -1.2 (-8.7 to 6.3)                                        | 0.753          |

**eTable 4. Predicted mean values and between group comparisons of KCCQ-OS, according to pattern mixture models (Iliofemoral cohort)**

|          | <b>TAVR</b>      | <b>SAVR</b>      | <b>Mean Treatment Difference (TAVR-SAVR) (95% CI)</b> | <b>P-Value</b> |
|----------|------------------|------------------|-------------------------------------------------------|----------------|
| 1 Month  | 67.2 (64.8-69.6) | 57.6 (54.8-60.3) | 9.6 (6.1 to 13.2)                                     | <0.001         |
| 6 Months | 69.9 (67.8-72.0) | 62.9 (60.6-65.2) | 7.0 (3.9 to 10.1)                                     | <0.001         |
| 1 Year   | 71.1 (69.0-73.2) | 66.7 (64.3-69.0) | 4.4 (1.4 to 7.4)                                      | 0.004          |
| 2 Years  | 68.4 (66.2-70.7) | 67.4 (64.8-70.0) | 1.0 (-2.3 to 4.4)                                     | 0.546          |
| 3 Years  | 62.3 (59.7-64.9) | 62.3 (59.2-65.3) | 0.0 (-3.9 to 4.0)                                     | 0.981          |
| 4 Years  | 56.5 (52.7-60.3) | 55.1 (50.8-59.3) | 1.4 (-3.7 to 6.5)                                     | 0.579          |
| 5 Years  | 54.8 (47.2-62.4) | 49.6 (41.5-57.7) | 5.2 (-2.5 to 13.0)                                    | 0.185          |
