# Supplementary material
Source: PubMed Central journal article supplement (PMC7527937)
Supplement: jamacardiol-e204397-s003.pdf [file jamacardiol-e204397-s003.pdf]

## **Data Sharing Statement**

Arnold. Five-Year Health Status After Self-Expanding Transcatheter or Surgical Aortic Valve Replacement in High-Risk Patients With Severe Aortic Stenosis. *JAMA Cardiol.* Published September 30, 2020.  
10.1001/jamacardio.2020.4397

### **Data**

**Data available:** No
